# Supplementary material for: Basilar artery dolichosis is associated with a poor 90-day outcome in acute isolated pontine infarction
Source: PubMed Central journal article supplement (PMC7162970; doi:10.1038/s41598-020-62873-4), 2020-04-16
Supplement: 41598_2020_62873_MOESM1_ESM.pdf [file 41598_2020_62873_MOESM1_ESM.pdf]

**Basilar artery dolichosis is associated with a poor 90-day outcome in acute  
isolated pontine infarction**

Shu-gang Cao<sup>1,+</sup>, Xiaoxing Ni<sup>1,+</sup>, Qian Wu<sup>1</sup>, Jun He<sup>1</sup>, Ping Cui<sup>2</sup>, Tingting Ge<sup>1</sup>,  
Yuancheng Li<sup>3</sup>, Jian Wang<sup>1</sup>, Wen'an XU<sup>1</sup>, Mingwu Xia<sup>1,\*</sup>

<sup>1</sup> the Hefei Affiliated Hospital of Anhui Medical University, the Second People's  
Hospital of Hefei, Department of Neurology, Hefei, Anhui 230011, P.R. China

<sup>2</sup> the Hefei Affiliated Hospital of Anhui Medical University, the Second People's  
Hospital of Hefei, Department of Radiology, Hefei, Anhui 230011, P.R. China

<sup>3</sup> Department of Epidemiology, School of Public Health, Nanjing Medical University,  
Nanjing, Jiangsu 210000, P.R. China

\*Corresponding author: Mingwu Xia, Email: xiamingwu1965@163.com

<sup>+</sup>these authors contributed equally to this work

**Supplementary table 1** Comparison of associated factors in patients with different 90-day outcomes.

| Variables                                       | 90-day outcome       |                      | <i>p</i><br><i>value</i> |
|-------------------------------------------------|----------------------|----------------------|--------------------------|
|                                                 | poor (n = 20)        | good (n = 81)        |                          |
| <b>Demographic data</b>                         |                      |                      |                          |
| Age (years)                                     | 70.5 (60.3, 78.8)    | 63.0 (56.5, 76.0)    | 0.218                    |
| Male, n (%)                                     | 11 (55.0)            | 48 (59.3)            | 0.729                    |
| <b>Risk factors</b>                             |                      |                      |                          |
| Hypertension, n (%)                             | 18 (90.0)            | 65 (80.2)            | 0.487                    |
| Diabetes, n (%)                                 | 9 (45.0)             | 37 (45.7)            | 0.956                    |
| Dyslipidemia, n (%)                             | 8 (40.0)             | 29 (35.8)            | 0.727                    |
| Smoking, n (%)                                  | 5 (25.0)             | 19 (23.5)            | 1.000                    |
| Drinking, n (%)                                 | 3 (15.0)             | 11 (13.6)            | 1.000                    |
| Prior stroke / TIA history, n (%)               | 6 (30.0)             | 17 (21.0)            | 0.573                    |
| <b>Time from onset to admission</b><br>(hours)  | 14.5 (7.0, 50.0)     | 45.0 (18.0, 69.5)    | 0.218                    |
| <b>Baseline NIHSS score</b> (scores)            | 7 (6, 8)             | 5 (3, 6)             | <0.001                   |
| <b>BA diameter</b> (mm)                         | 2.91 ±0.44           | 2.82 ±0.65           | 0.531                    |
| <b>Length of BA</b>                             |                      |                      |                          |
| Curve length (mm)                               | 30.61 (26.81, 34.54) | 26.44 (23.57, 30.10) | 0.012                    |
| BAL (mm)                                        | 28.39 (25.61, 31.44) | 26.04 (22.95, 28.64) | 0.039                    |
| BL (mm)                                         | 4.12 (2.97, 6.97)    | 0 (0, 4.74)          | 0.011                    |
| <b>BA dolichosis</b> , n (%)                    | 12 (60.0)            | 22 (27.2)            | 0.005                    |
| <b>BA bending</b> , n (%)                       | 16 (80.0)            | 37 (46.7)            | 0.006                    |
| <b>BADE</b> , n (%)                             | 0 (0)                | 1 (1.2)              | 1.000*                   |
| <b>BAH</b> , n (%)                              | 1 (5.0)              | 10 (12.3)            | 0.587                    |
| <b>BA stenosis</b> , n (%)                      | 4 (20)               | 12 (14.8)            | 0.821                    |
| <b>Infarct size</b> (mm)                        | 15.80 ±4.61          | 14.55 ±4.98          | 0.312                    |
| <b>Initial treatment after admission</b>        |                      |                      |                          |
| Dual antiplatelet therapy, n (%)                | 6 (30.0)             | 30 (37.0)            | 0.558                    |
| Single-antiplatelet therapy, n (%)              | 13 (65.0)            | 50 (61.8)            |                          |
| Single-antiplatelet plus anticoagulation, n (%) | 1 (5.0)              | 1 (1.2)              |                          |

TIA transient ischemic attack, BA basilar artery, BAL basilar artery length, BL bending length,

BADE basilar artery dolichoectasia, BAH basilar artery hypoplasia. \* Fisher's Exact Test

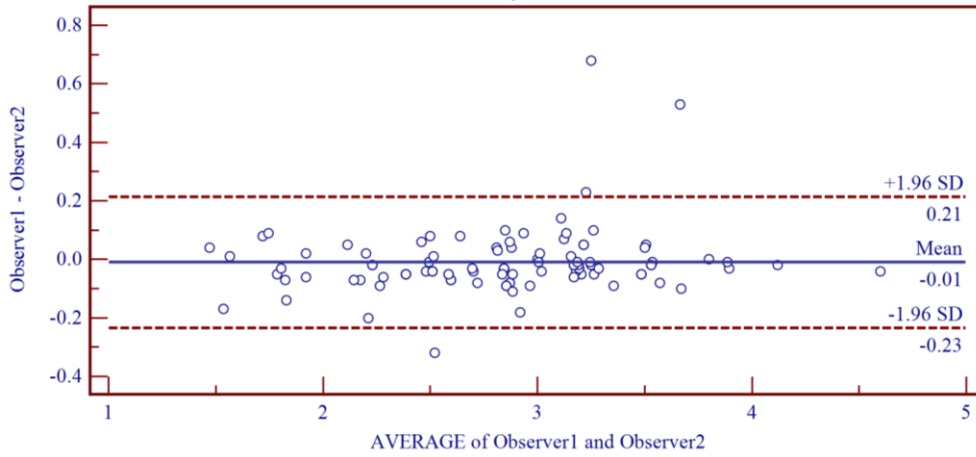

**Supplementary Figure 1.** Bland-Altman plot of BA diameter of the senior and junior readers.

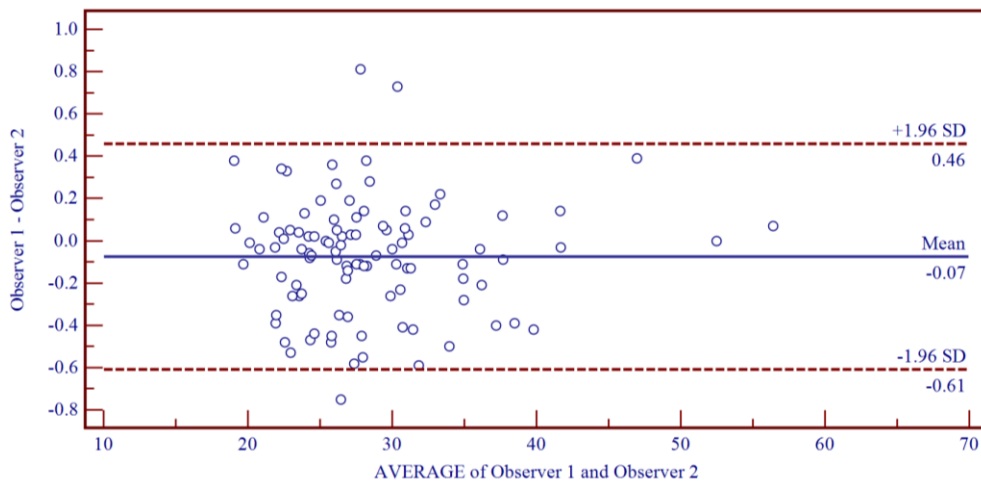

**Supplementary Figure 2.** Bland-Altman plot of BA curve length of the senior and junior readers.

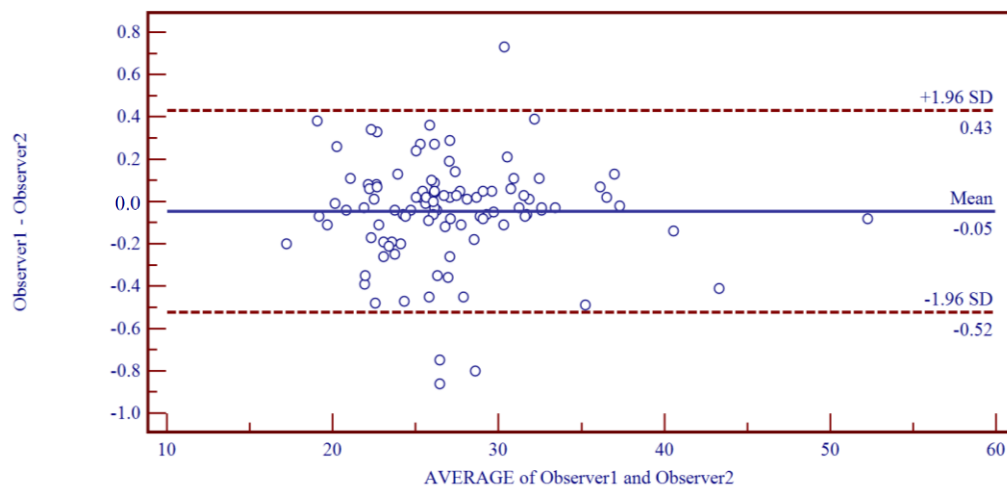

**Supplementary Figure 3.** Bland-Altman plot of basilar artery length (BAL) of the senior and junior readers.
